# Supplementary material for: Isolation, Characterization, and Bioactivity Evaluation of 3-((6-Methylpyrazin-2-yl)methyl)-1H-indole, a New Alkaloid from a Deep-Sea-Derived Actinomycete Serinicoccus profundi sp. nov
Source: MDPI journal article supplement (doi:10.3390/md11010033), 2012-12-27
Supplement: s1 [file s1]

marinedrugs-11-00033-s001.mol
  corina  07071423033D 1   1.00000     0.00000 
CORINA 3.49 0023  12.04.2013
 17 19  0  0  0  0  0  0  0  0999 V2000
   -0.0167    1.3837    0.0096 C   0  0  0  0  0  0  0  0  0  0  0  0
    0.0021   -0.0041    0.0020 C   0  0  0  0  0  0  0  0  0  0  0  0
    1.1966   -0.6906   -0.0131 C   0  0  0  0  0  0  0  0  0  0  0  0
    1.1509    2.0938    0.0023 C   0  0  0  0  0  0  0  0  0  0  0  0
    2.3725    1.4186   -0.0130 C   0  0  0  0  0  0  0  0  0  0  0  0
    2.3970    0.0118   -0.0207 C   0  0  0  0  0  0  0  0  0  0  0  0
    3.7195   -0.3712   -0.0350 N   0  0  0  0  0  0  0  0  0  0  0  0
    4.5243    0.7354   -0.0364 C   0  0  0  0  0  0  0  0  0  0  0  0
    3.7731    1.8478   -0.0245 C   0  0  0  0  0  0  0  0  0  0  0  0
    5.4536    3.5221    2.1722 C   0  0  0  0  0  0  0  0  0  0  0  0
    4.3382    3.7773    1.3947 C   0  0  0  0  0  0  0  0  0  0  0  0
    4.2752    3.2687   -0.0225 C   0  0  0  0  0  0  0  0  0  0  0  0
    5.5087    3.9677    3.4152 N   0  0  0  0  0  0  0  0  0  0  0  0
    4.4984    4.6569    3.9152 C   0  0  0  0  0  0  0  0  0  0  0  0
    3.3826    4.9122    3.1374 C   0  0  0  0  0  0  0  0  0  0  0  0
    3.3276    4.4666    1.8948 N   0  0  0  0  0  0  0  0  0  0  0  0
    2.2301    5.6978    3.7079 C   0  0  0  0  0  0  0  0  0  0  0  0
  1  2  2  0      
  2  3  1  0      
  3  6  2  0      
  5  4  2  0      
  4  1  1  0      
  5  6  1  0      
  6  7  1  0      
  7  8  1  0      
  8  9  2  0      
  5  9  1  0      
 10 11  2  0      
 11 12  1  0      
 12  9  1  0      
 10 13  1  0      
 13 14  2  0      
 14 15  1  0      
 15 16  2  0      
 16 11  1  0      
 15 17  1  0      
M  END
$$$$
