# Supplementary material for: Isolation, Characterization, and Bioactivity Evaluation of 3-((6-Methylpyrazin-2-yl)methyl)-1H-indole, a New Alkaloid from a Deep-Sea-Derived Actinomycete Serinicoccus profundi sp. nov
Source: MDPI journal article supplement (doi:10.3390/md11010033), 2012-12-27
Supplement: s2 [file s2]

marinedrugs-11-00033-s001.mol
  ChemDraw06021422232D

 17 19  0  0  0  0  0  0  0  0999 V2000
   -3.2156    0.4132    0.0000 C   0  0  0  0  0  0  0  0  0  0  0  0
   -3.2156   -0.4118    0.0000 C   0  0  0  0  0  0  0  0  0  0  0  0
   -2.5011   -0.8243    0.0000 C   0  0  0  0  0  0  0  0  0  0  0  0
   -2.5011    0.8257    0.0000 C   0  0  0  0  0  0  0  0  0  0  0  0
   -1.7867    0.4132    0.0000 C   0  0  0  0  0  0  0  0  0  0  0  0
   -1.7867   -0.4118    0.0000 C   0  0  0  0  0  0  0  0  0  0  0  0
   -1.0724   -0.8257    0.0000 N   0  0  0  0  0  0  0  0  0  0  0  0
   -0.3568   -0.4118    0.0000 C   0  0  0  0  0  0  0  0  0  0  0  0
   -0.3568    0.4132    0.0000 C   0  0  0  0  0  0  0  0  0  0  0  0
    1.0722   -0.4118    0.0000 C   0  0  0  0  0  0  0  0  0  0  0  0
    1.0722    0.4132    0.0000 C   0  0  0  0  0  0  0  0  0  0  0  0
    0.3577    0.8257    0.0000 C   0  0  0  0  0  0  0  0  0  0  0  0
    1.7867   -0.8243    0.0000 N   0  0  0  0  0  0  0  0  0  0  0  0
    2.5011   -0.4118    0.0000 C   0  0  0  0  0  0  0  0  0  0  0  0
    2.5011    0.4132    0.0000 C   0  0  0  0  0  0  0  0  0  0  0  0
    1.7867    0.8257    0.0000 N   0  0  0  0  0  0  0  0  0  0  0  0
    3.2156    0.8257    0.0000 C   0  0  0  0  0  0  0  0  0  0  0  0
  1  2  2  0      
  2  3  1  0      
  3  6  2  0      
  5  4  2  0      
  4  1  1  0      
  5  6  1  0      
  6  7  1  0      
  7  8  1  0      
  8  9  2  0      
  5  9  1  0      
 10 11  2  0      
 11 12  1  0      
 12  9  1  0      
 10 13  1  0      
 13 14  2  0      
 14 15  1  0      
 15 16  2  0      
 16 11  1  0      
 15 17  1  0      
M  END
