# Supplementary material for: Isolation, Characterization, and Bioactivity Evaluation of 3-((6-Methylpyrazin-2-yl)methyl)-1H-indole, a New Alkaloid from a Deep-Sea-Derived Actinomycete Serinicoccus profundi sp. nov
Source: MDPI journal article supplement (doi:10.3390/md11010033), 2012-12-27
Supplement: s3 [file s3]

marinedrugs-11-00033-s002.mol
  corina  07071423033D 1   1.00000     0.00000 
CORINA 3.49 0023  12.04.2013
 17 18  0  0  0  0  0  0  0  0999 V2000
   -0.0167    1.3837    0.0096 C   0  0  0  0  0  0  0  0  0  0  0  0
    0.0021   -0.0041    0.0020 C   0  0  0  0  0  0  0  0  0  0  0  0
    1.1966   -0.6906   -0.0131 C   0  0  0  0  0  0  0  0  0  0  0  0
    1.1509    2.0938    0.0023 C   0  0  0  0  0  0  0  0  0  0  0  0
    2.3725    1.4186   -0.0130 C   0  0  0  0  0  0  0  0  0  0  0  0
    2.3970    0.0118   -0.0207 C   0  0  0  0  0  0  0  0  0  0  0  0
    3.7195   -0.3712   -0.0350 N   0  0  0  0  0  0  0  0  0  0  0  0
    4.5243    0.7354   -0.0364 C   0  0  0  0  0  0  0  0  0  0  0  0
    3.7731    1.8478   -0.0245 C   0  0  0  0  0  0  0  0  0  0  0  0
    2.9852    3.8517    1.9718 N   0  0  0  0  0  0  0  0  0  0  0  0
    4.3391    3.7850    1.4163 C   0  0  0  0  0  0  0  0  0  0  0  0
    4.2752    3.2687   -0.0225 C   0  0  0  0  0  0  0  0  0  0  0  0
    2.7994    3.7810    3.3048 C   0  0  0  0  0  0  0  0  0  0  0  0
    1.4066    3.8496    3.8762 C   0  0  0  0  0  0  0  0  0  0  0  0
    4.2369    6.0383    0.5486 O   0  0  0  0  0  0  0  0  0  0  0  0
    4.9653    5.1810    1.4299 C   0  0  0  0  0  0  0  0  0  0  0  0
    3.7532    3.6622    4.0445 O   0  0  0  0  0  0  0  0  0  0  0  0
  1  2  2  0      
  2  3  1  0      
  3  6  2  0      
  5  4  2  0      
  4  1  1  0      
  5  6  1  0      
  6  7  1  0      
  7  8  1  0      
  8  9  2  0      
  5  9  1  0      
 11 12  1  0      
 12  9  1  0      
 10 13  1  0      
 13 14  1  0      
 15 16  1  0      
 16 11  1  0      
 13 17  2  0      
 11 10  1  0      
M  END
$$$$
