# Supplementary material for: Isolation, Characterization, and Bioactivity Evaluation of 3-((6-Methylpyrazin-2-yl)methyl)-1H-indole, a New Alkaloid from a Deep-Sea-Derived Actinomycete Serinicoccus profundi sp. nov
Source: MDPI journal article supplement (doi:10.3390/md11010033), 2012-12-27
Supplement: s4 [file s4]

marinedrugs-11-00033-s002.mol
  ChemDraw06021422242D

 17 18  0  0  0  0  0  0  0  0999 V2000
   -2.8584    0.8250    0.0000 C   0  0  0  0  0  0  0  0  0  0  0  0
   -2.8584    0.0000    0.0000 C   0  0  0  0  0  0  0  0  0  0  0  0
   -2.1439   -0.4125    0.0000 C   0  0  0  0  0  0  0  0  0  0  0  0
   -2.1439    1.2375    0.0000 C   0  0  0  0  0  0  0  0  0  0  0  0
   -1.4294    0.8250    0.0000 C   0  0  0  0  0  0  0  0  0  0  0  0
   -1.4294    0.0000    0.0000 C   0  0  0  0  0  0  0  0  0  0  0  0
   -0.7152   -0.4140    0.0000 N   0  0  0  0  0  0  0  0  0  0  0  0
    0.0005    0.0000    0.0000 C   0  0  0  0  0  0  0  0  0  0  0  0
    0.0005    0.8250    0.0000 C   0  0  0  0  0  0  0  0  0  0  0  0
    1.4294    0.0000    0.0000 N   0  0  0  0  0  0  0  0  0  0  0  0
    1.4294    0.8250    0.0000 C   0  0  0  0  0  0  0  0  0  0  0  0
    0.7150    1.2375    0.0000 C   0  0  0  0  0  0  0  0  0  0  0  0
    2.1439   -0.4125    0.0000 C   0  0  0  0  0  0  0  0  0  0  0  0
    2.8584    0.0000    0.0000 C   0  0  0  0  0  0  0  0  0  0  0  0
    2.8584    0.8250    0.0000 O   0  0  0  0  0  0  0  0  0  0  0  0
    2.1439    1.2375    0.0000 C   0  0  0  0  0  0  0  0  0  0  0  0
    2.1439   -1.2375    0.0000 O   0  0  0  0  0  0  0  0  0  0  0  0
  1  2  2  0      
  2  3  1  0      
  3  6  2  0      
  5  4  2  0      
  4  1  1  0      
  5  6  1  0      
  6  7  1  0      
  7  8  1  0      
  8  9  2  0      
  5  9  1  0      
 11 12  1  0      
 12  9  1  0      
 10 13  1  0      
 13 14  1  0      
 15 16  1  0      
 16 11  1  0      
 13 17  2  0      
 11 10  1  1      
M  END
