# Supplementary material for: Isolation, Characterization, and Bioactivity Evaluation of 3-((6-Methylpyrazin-2-yl)methyl)-1H-indole, a New Alkaloid from a Deep-Sea-Derived Actinomycete Serinicoccus profundi sp. nov
Source: MDPI journal article supplement (doi:10.3390/md11010033), 2012-12-27
Supplement: s5 [file s5]

marinedrugs-11-00033-s003.mol
  corina  07071423033D 1   1.00000     0.00000 
CORINA 3.49 0023  12.04.2013
 21 23  0  0  0  0  0  0  0  0999 V2000
   -0.0180    1.4731    0.0101 N   0  0  0  0  0  0  0  0  0  0  0  0
    0.0021   -0.0041    0.0020 C   0  0  0  0  0  0  0  0  0  0  0  0
    1.1995   -0.4464    0.8061 C   0  0  0  0  0  0  0  0  0  0  0  0
    2.3134    0.3092    0.8269 N   0  0  0  0  0  0  0  0  0  0  0  0
    2.4261    1.5470    0.0562 C   0  0  0  0  0  0  0  0  0  0  0  0
    1.0837    2.2420    0.0038 C   0  0  0  0  0  0  0  0  0  0  0  0
    5.6412    2.0767   -0.4245 C   0  0  0  0  0  0  0  0  0  0  0  0
    4.8151    1.8325    0.6567 C   0  0  0  0  0  0  0  0  0  0  0  0
    3.4505    2.4687    0.7211 C   0  0  0  0  0  0  0  0  0  0  0  0
    6.8929    1.4932   -0.4836 C   0  0  0  0  0  0  0  0  0  0  0  0
    7.3186    0.6653    0.5384 C   0  0  0  0  0  0  0  0  0  0  0  0
    6.4923    0.4207    1.6192 C   0  0  0  0  0  0  0  0  0  0  0  0
    5.2406    1.0043    1.6784 C   0  0  0  0  0  0  0  0  0  0  0  0
   -1.4306    1.8760    0.0611 C   0  0  0  0  0  0  0  0  0  0  0  0
   -2.0545    0.8408    1.0343 C   0  0  0  0  0  0  0  0  0  0  0  0
   -1.2942   -0.4625    0.6924 C   0  0  0  0  0  0  0  0  0  0  0  0
    1.0046    3.4513   -0.0416 O   0  0  0  0  0  0  0  0  0  0  0  0
    1.1583   -1.4830    1.4344 O   0  0  0  0  0  0  0  0  0  0  0  0
    8.2962    0.2089    0.4918 H   0  0  0  0  0  0  0  0  0  0  0  0
    2.7533    1.3144   -0.9571 H   0  0  0  0  0  0  0  0  0  0  0  0
    0.0651   -0.3816   -1.0186 H   0  0  0  0  0  0  0  0  0  0  0  0
  1  2  1  0      
  2  3  1  0      
  3  4  1  0      
  4  5  1  0      
  5  6  1  0      
  6  1  1  0      
  7  8  2  0      
  8  9  1  0      
  9  5  1  0      
  7 10  1  0      
 10 11  2  0      
 11 12  1  0      
 12 13  2  0      
 13  8  1  0      
  1 14  1  0      
 14 15  1  0      
 15 16  1  0      
 16  2  1  0      
  6 17  2  0      
  3 18  2  0      
 11 19  1  0      
  5 20  1  0      
  2 21  1  0      
M  END
$$$$
