# Supplementary material for: Isolation, Characterization, and Bioactivity Evaluation of 3-((6-Methylpyrazin-2-yl)methyl)-1H-indole, a New Alkaloid from a Deep-Sea-Derived Actinomycete Serinicoccus profundi sp. nov
Source: MDPI journal article supplement (doi:10.3390/md11010033), 2012-12-27
Supplement: s6 [file s6]

marinedrugs-11-00033-s003.mol
  ChemDraw06021422242D

 21 23  0  0  0  0  0  0  0  0999 V2000
   -1.8659    0.4125    0.0000 N   0  0  0  0  0  0  0  0  0  0  0  0
   -1.8659   -0.4125    0.0000 C   0  0  0  0  0  0  0  0  0  0  0  0
   -1.1514   -0.8250    0.0000 C   0  0  0  0  0  0  0  0  0  0  0  0
   -0.4369   -0.4125    0.0000 N   0  0  0  0  0  0  0  0  0  0  0  0
   -0.4369    0.4125    0.0000 C   0  0  0  0  0  0  0  0  0  0  0  0
   -1.1514    0.8250    0.0000 C   0  0  0  0  0  0  0  0  0  0  0  0
    0.9920   -0.4125    0.0000 C   0  0  0  0  0  0  0  0  0  0  0  0
    0.9920    0.4125    0.0000 C   0  0  0  0  0  0  0  0  0  0  0  0
    0.2775    0.8250    0.0000 C   0  0  0  0  0  0  0  0  0  0  0  0
    1.7065   -0.8250    0.0000 C   0  0  0  0  0  0  0  0  0  0  0  0
    2.4209   -0.4125    0.0000 C   0  0  0  0  0  0  0  0  0  0  0  0
    2.4209    0.4125    0.0000 C   0  0  0  0  0  0  0  0  0  0  0  0
    1.7065    0.8250    0.0000 C   0  0  0  0  0  0  0  0  0  0  0  0
   -2.6505    0.6674    0.0000 C   0  0  0  0  0  0  0  0  0  0  0  0
   -3.1354    0.0000    0.0000 C   0  0  0  0  0  0  0  0  0  0  0  0
   -2.6505   -0.6674    0.0000 C   0  0  0  0  0  0  0  0  0  0  0  0
   -1.1514    1.6500    0.0000 O   0  0  0  0  0  0  0  0  0  0  0  0
   -1.1514   -1.6500    0.0000 O   0  0  0  0  0  0  0  0  0  0  0  0
    3.1354   -0.8250    0.0000 H   0  0  0  0  0  0  0  0  0  0  0  0
   -0.4369    1.2375    0.0000 H   0  0  0  0  0  0  0  0  0  0  0  0
   -2.0794   -1.2094    0.0000 H   0  0  0  0  0  0  0  0  0  0  0  0
  1  2  1  0      
  2  3  1  0      
  3  4  1  0      
  4  5  1  0      
  5  6  1  0      
  6  1  1  0      
  7  8  2  0      
  8  9  1  0      
  9  5  1  0      
  7 10  1  0      
 10 11  2  0      
 11 12  1  0      
 12 13  2  0      
 13  8  1  0      
  1 14  1  0      
 14 15  1  0      
 15 16  1  0      
 16  2  1  0      
  6 17  2  0      
  3 18  2  0      
 11 19  1  0      
  5 20  1  6      
  2 21  1  6      
M  END
