# Supplementary material for: Isolation, Characterization, and Bioactivity Evaluation of 3-((6-Methylpyrazin-2-yl)methyl)-1H-indole, a New Alkaloid from a Deep-Sea-Derived Actinomycete Serinicoccus profundi sp. nov
Source: MDPI journal article supplement (doi:10.3390/md11010033), 2012-12-27
Supplement: s7 [file s7]

marinedrugs-11-00033-s004.mol
  corina  07071423043D 1   1.00000     0.00000 
CORINA 3.49 0023  12.04.2013
 13 13  0  0  0  0  0  0  0  0999 V2000
   -0.0167    1.3831    0.0096 C   0  0  0  0  0  0  0  0  0  0  0  0
    0.0021   -0.0041    0.0020 C   0  0  0  0  0  0  0  0  0  0  0  0
    1.2141   -0.6789   -0.0132 C   0  0  0  0  0  0  0  0  0  0  0  0
    2.3989    0.0314   -0.0207 C   0  0  0  0  0  0  0  0  0  0  0  0
    2.3774    1.4139   -0.0126 C   0  0  0  0  0  0  0  0  0  0  0  0
    1.1708    2.0889    0.0021 C   0  0  0  0  0  0  0  0  0  0  0  0
    4.0963    2.4560   -1.4647 C   0  0  0  0  0  0  0  0  0  0  0  0
    3.6714    2.1863   -0.0198 C   0  0  0  0  0  0  0  0  0  0  0  0
    5.3923    3.2541   -3.6894 O   0  0  0  0  0  0  0  0  0  0  0  0
    5.9224    3.5590   -2.6420 C   0  0  0  0  0  0  0  0  0  0  0  0
    5.3542    3.2069   -1.4717 N   0  0  0  0  0  0  0  0  0  0  0  0
    7.2163    4.3314   -2.6492 C   0  0  0  0  0  0  0  0  0  0  0  0
   -1.1648   -0.7006    0.0099 O   0  0  0  0  0  0  0  0  0  0  0  0
  1  2  2  0      
  2  3  1  0      
  3  4  2  0      
  4  5  1  0      
  5  6  2  0      
  6  1  1  0      
  7  8  1  0      
  8  5  1  0      
  9 10  2  0      
 10 11  1  0      
 11  7  1  0      
 10 12  1  0      
  2 13  1  0      
M  END
$$$$
