# Supplementary material for: Isolation, Characterization, and Bioactivity Evaluation of 3-((6-Methylpyrazin-2-yl)methyl)-1H-indole, a New Alkaloid from a Deep-Sea-Derived Actinomycete Serinicoccus profundi sp. nov
Source: MDPI journal article supplement (doi:10.3390/md11010033), 2012-12-27
Supplement: s9 [file s9]

marinedrugs-11-00033-s005.mol
  corina  07071423043D 1   1.00000     0.00000 
CORINA 3.49 0023  12.04.2013
 14 14  0  0  0  0  0  0  0  0999 V2000
   -0.0166    1.3763    0.0096 C   0  0  0  0  0  0  0  0  0  0  0  0
    0.0021   -0.0041    0.0020 C   0  0  0  0  0  0  0  0  0  0  0  0
    1.2064   -0.6904   -0.0131 C   0  0  0  0  0  0  0  0  0  0  0  0
    2.3989   -0.0023   -0.0208 C   0  0  0  0  0  0  0  0  0  0  0  0
    2.3964    1.3978   -0.0133 C   0  0  0  0  0  0  0  0  0  0  0  0
    1.1735    2.0883    0.0021 C   0  0  0  0  0  0  0  0  0  0  0  0
    4.9727    1.3930   -0.0369 C   0  0  0  0  0  0  0  0  0  0  0  0
    3.6634    2.1390   -0.0209 C   0  0  0  0  0  0  0  0  0  0  0  0
    6.1299    2.3939   -0.0421 C   0  0  0  0  0  0  0  0  0  0  0  0
    3.6565    3.3520   -0.0143 O   0  0  0  0  0  0  0  0  0  0  0  0
    1.1565    3.4442    0.0091 O   0  0  0  0  0  0  0  0  0  0  0  0
    7.4392    1.6479   -0.0581 C   0  0  0  0  0  0  0  0  0  0  0  0
    7.4460    0.4396   -0.0646 O   0  0  0  0  0  0  0  0  0  0  0  0
    8.5978    2.3256   -0.0650 O   0  0  0  0  0  0  0  0  0  0  0  0
  1  2  2  0      
  2  3  1  0      
  3  4  2  0      
  4  5  1  0      
  5  6  2  0      
  6  1  1  0      
  7  8  1  0      
  8  5  1  0      
  9  7  1  0      
  8 10  2  0      
  6 11  1  0      
  9 12  1  0      
 12 13  2  0      
 12 14  1  0      
M  STY  1   1 SUP
M  SLB  1   1   1
M  SAL   1  3  12  13  14
M  SBL   1  1  12
M  SMT   1 COOH
M  SBV   1 12   -6.6339    3.5475
M  END
$$$$
