# Supplementary material for: Isolation, Characterization, and Bioactivity Evaluation of 3-((6-Methylpyrazin-2-yl)methyl)-1H-indole, a New Alkaloid from a Deep-Sea-Derived Actinomycete Serinicoccus profundi sp. nov
Source: MDPI journal article supplement (doi:10.3390/md11010033), 2012-12-27
Supplement: s10 [file s10]

marinedrugs-11-00033-s005.mol
  ChemDraw06021422242D

 14 14  0  0  0  0  0  0  0  0999 V2000
   -2.1434    0.0000    0.0000 C   0  0  0  0  0  0  0  0  0  0  0  0
   -2.1434   -0.8250    0.0000 C   0  0  0  0  0  0  0  0  0  0  0  0
   -1.4289   -1.2375    0.0000 C   0  0  0  0  0  0  0  0  0  0  0  0
   -0.7144   -0.8250    0.0000 C   0  0  0  0  0  0  0  0  0  0  0  0
   -0.7144    0.0000    0.0000 C   0  0  0  0  0  0  0  0  0  0  0  0
   -1.4289    0.4125    0.0000 C   0  0  0  0  0  0  0  0  0  0  0  0
    0.7145    0.0000    0.0000 C   0  0  0  0  0  0  0  0  0  0  0  0
    0.0001    0.4125    0.0000 C   0  0  0  0  0  0  0  0  0  0  0  0
    1.4290    0.4125    0.0000 C   0  0  0  0  0  0  0  0  0  0  0  0
    0.0001    1.2375    0.0000 O   0  0  0  0  0  0  0  0  0  0  0  0
   -1.4289    1.2375    0.0000 O   0  0  0  0  0  0  0  0  0  0  0  0
    2.1434   -0.4125    0.0000 C   0  0  0  0  0  0  0  0  0  0  0  0
    2.1434    0.4125    0.0000 O   0  0  0  0  0  0  0  0  0  0  0  0
    1.4289   -0.8250    0.0000 O   0  0  0  0  0  0  0  0  0  0  0  0
  1  2  2  0      
  2  3  1  0      
  3  4  2  0      
  4  5  1  0      
  5  6  2  0      
  6  1  1  0      
  7  8  1  0      
  8  5  1  0      
  9  7  1  0      
  8 10  2  0      
  6 11  1  0      
  9 12  1  0      
 12 13  2  0      
 12 14  1  0      
M  STY  1   1 SUP
M  SLB  1   1   1
M  SAL   1  3  12  13  14
M  SBL   1  1  12
M  SMT   1 COOH
M  SBV   1 12   -6.6339    3.5475
M  END
